# Supplementary figures and images for: Age-Related Trends in Psychotropic Medication Use Among Very Young Children in Foster Care
Source: Atypon-hosted journal article supplement (doi:10.1176/appi.ps.201300353), 2014-08-01

**Figure 1. Illustration of the study design and subject follow-up over the three year study period**

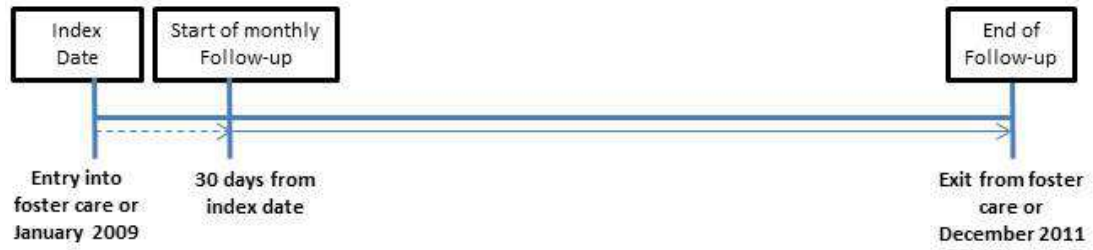

Supplement: appi.ps.201300353.ds001.pdf [file appi.ps.201300353.ds001.pdf]
